# Supplementary material for: Coherent random lasing from nano-scale aggregates of hybrid molecules by enhanced near zone scattering
Source: Royal Society of Chemistry journal article supplement (doi:10.1039/c6ra10511d), 2016-01-01
Supplement: c6ra10511d1.pdf [file c6ra10511d1.pdf]

## Supporting information

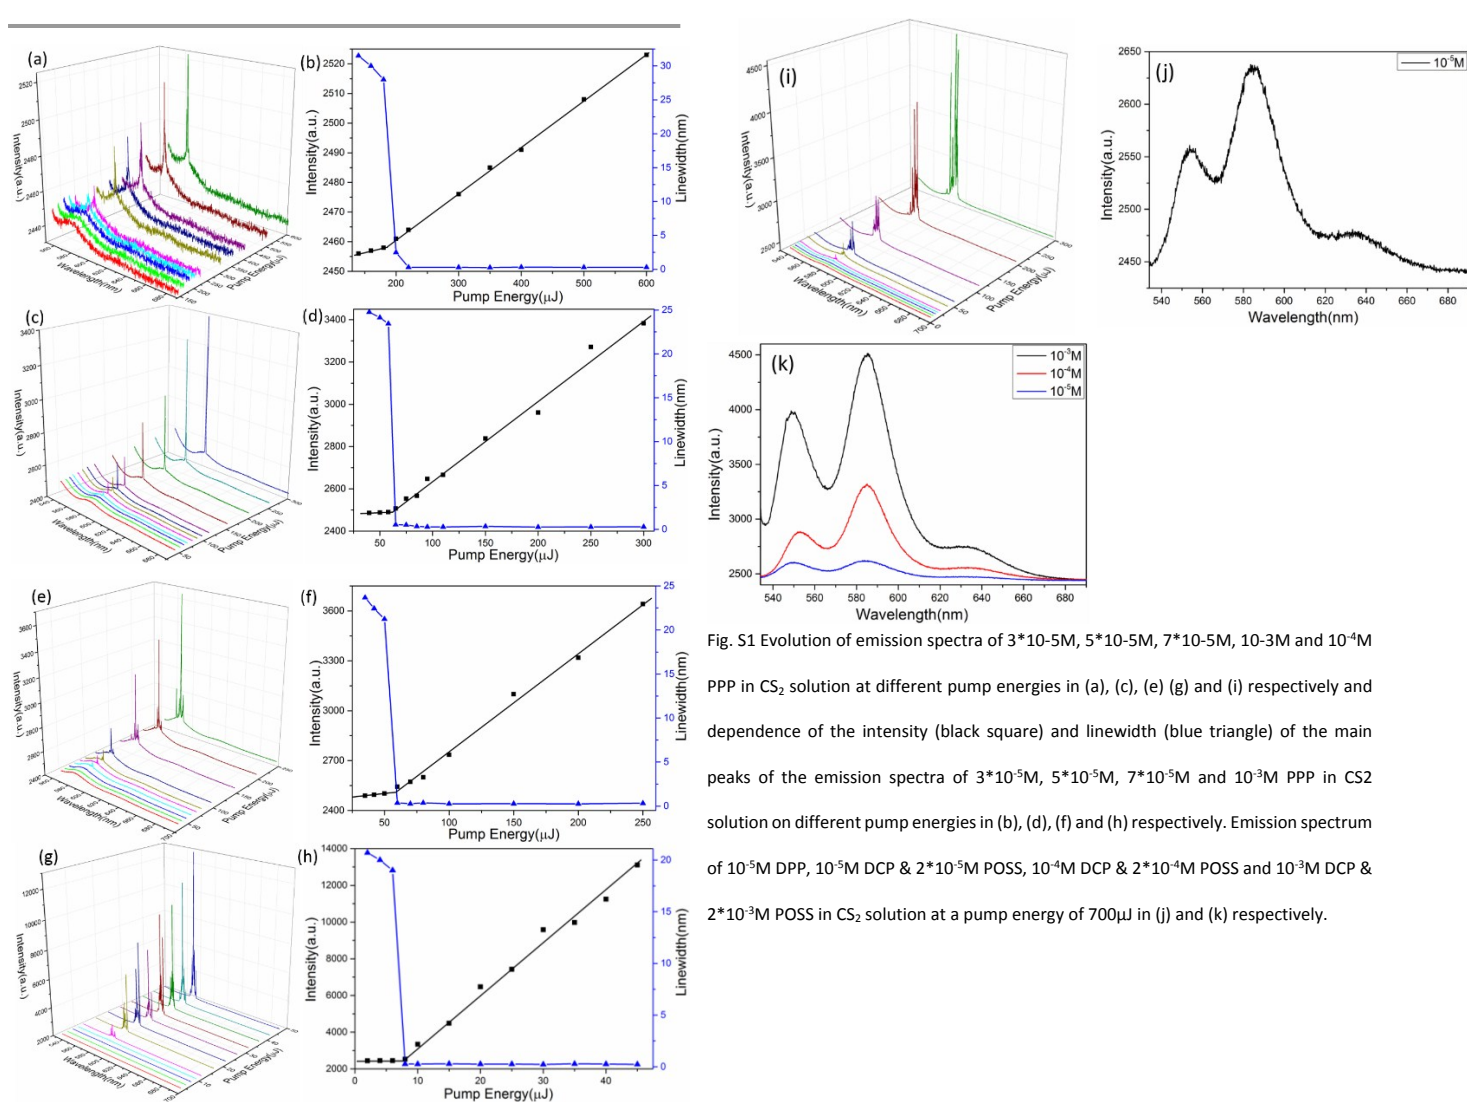

Fig. S1 Evolution of emission spectra of 3\*10<sup>-5</sup>M, 5\*10<sup>-5</sup>M, 7\*10<sup>-5</sup>M, 10<sup>-3</sup>M and 10<sup>-4</sup>M PPP in CS<sub>2</sub> solution at different pump energies in (a), (c), (e) (g) and (i) respectively and dependence of the intensity (black square) and linewidth (blue triangle) of the main peaks of the emission spectra of 3\*10<sup>-5</sup>M, 5\*10<sup>-5</sup>M, 7\*10<sup>-5</sup>M and 10<sup>-3</sup>M PPP in CS<sub>2</sub> solution on different pump energies in (b), (d), (f) and (h) respectively. Emission spectrum of 10<sup>-5</sup>M DPP, 10<sup>-5</sup>M DCP & 2\*10<sup>-5</sup>M POSS, 10<sup>-4</sup>M DCP & 2\*10<sup>-4</sup>M POSS and 10<sup>-3</sup>M DCP & 2\*10<sup>-3</sup>M POSS in CS<sub>2</sub> solution at a pump energy of 700 μJ in (j) and (k) respectively.
